PEARLS

# A Mother's Gift: Congenital Transmission of *Trypanosoma* and *Leishmania* Species

Tara Grinnage-Pulley, Benjamin Scott, Christine A. Petersen\*

Department of Epidemiology, College of Public Health, University of Iowa, Iowa City, Iowa, United States of America

\* [christine-petersen@uiowa.edu](mailto:christine-petersen@uiowa.edu)

## Are Kinetoplastids Transmitted Vertically?

Kinetoplastids *Leishmania infantum* and *Trypanosoma cruzi*, the causative agents of zoonotic visceral leishmaniasis (ZVL) and Chagas' disease (CD), respectively, can both be transmitted vertically in utero from mother to infant [1]. Congenital infection can be either asymptomatic infection or overt, symptomatic infection [2].

Dogs are a primary domestic reservoir associated with human CD in certain endemic areas and with human ZVL where *L. infantum* infection predominates. CD, or American Trypanosomiasis, is endemic in 21 countries within the Americas, where classical transmission is via reduviid bugs. Dogs can present with clinical CD. Although rarer, vertical transmission of CD has been reported in dogs. *L. infantum* (syn. *L. chagasi*) is one of the *Leishmania* species causing visceral leishmaniasis (VL). *L. donovani*, another causative agent of VL and predominantly a human pathogen, has not demonstrated vertical transmission, but this is an understudied area. *L. infantum* is endemic in the Americas and the Mediterranean region, with primary transmission by sand fly. Although both *Lutzomyia shannoni* and *Lu. anthophora*, present in North America, are potential vectors for *Leishmania* spp. [3], sand fly transmission of *L. infantum* in North America has not been confirmed. VL is not endemic in North American human populations, but it is endemic in hunting dogs due to vertical transmission of *L. infantum* [4,5].

## What Is the Scope of Vertically Transmitted Kinetoplastid Disease and How Is It Detected?

Global travel and migration has brought people and animals with CD and VL to non-endemic regions (Fig 1). CD is estimated to affect 6–7 million people annually [6,7]. There are an estimated 2 million women of child-bearing age in the Americas at risk of congenitally transmitting CD [8]. Seroprevalence in pregnant women ranges from <1% to 64% based on location [5], with estimates of vertical transmission rates varying geographically from 1% to 12% [8,9]. The average transmission rate is 5% (Fig 1A) [2,9]. In Latin America, this results in an estimated 8,700 to 15,000 annual congenital cases of CD [2,5,6,10]. Interestingly, there have been several cases of vertical transmission occurring in familial clusters [11,12]. Fourteen cases of *T. cruzi* transmission in multiple pregnancies resulted in families with congenitally infected siblings [13]. Four cases had transmission across two generations, from grandmother to mother to child [13]. Underlying reasons for the familial clustering, beyond lack of diagnosis, were unknown.

These case reports, along with a survey of United States obstetrician-gynecologists with 70% of respondents having “very limited” knowledge of CD, highlight the need for awareness of congenital CD for better diagnosis and to prevent additional occurrence of congenital CD from

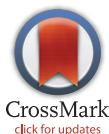

## OPEN ACCESS

**Citation:** Grinnage-Pulley T, Scott B, Petersen CA (2016) A Mother's Gift: Congenital Transmission of *Trypanosoma* and *Leishmania* Species. PLoS Pathog 12(1): e1005302. doi:10.1371/journal.ppat.1005302

**Editor:** Laura J Knoll, University of Wisconsin Medical School, UNITED STATES

**Published:** January 28, 2016

**Copyright:** © 2016 Grinnage-Pulley et al. This is an open access article distributed under the terms of the [Creative Commons Attribution License](https://creativecommons.org/licenses/by/4.0/), which permits unrestricted use, distribution, and reproduction in any medium, provided the original author and source are credited.

**Funding:** The work was funded by the University of Iowa through start-up funds and by the Morris Animal Foundation. The funders had no role in study design, data collection and analysis, decision to publish, or preparation of the manuscript.

**Competing Interests:** The authors have declared that no competing interests exist.

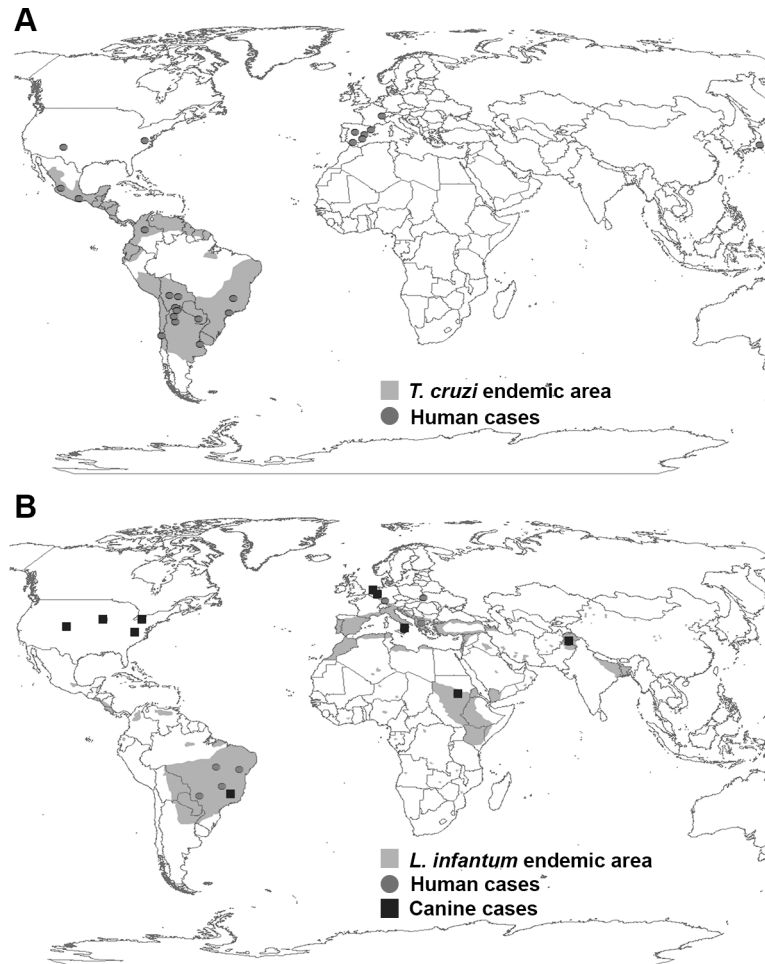

**Fig 1. Geographic distribution of *T. cruzi* and *L. infantum* endemic areas and congenitally transmitted cases as reported in peer-reviewed literature.** Endemic regions for (A) *T. cruzi* and (B) *L. infantum* are shaded. Gray dots represent at least one report of human congenital infection with (A) *T. cruzi* or (B) *L. infantum*. Black squares represent at least one report of (B) canine congenital infection with *L. infantum*. Maps created with ArcMap, Version 10.2 (Esri). See [S1 File](#) for case and location references.

doi:10.1371/journal.ppat.1005302.g001

any infected mother [11–14]. Diagnosis of congenital CD is complicated. It requires confirmation of chronic maternal infection through serologic, molecular (PCR-based), or rapid (immunochromogenic, immunodot, etc.) diagnostics [1,15–19]. Serologic tests include enzyme immunoassay (EIA), enzyme-linked immunosorbent assay (ELISA), or indirect immunofluorescent assay (IFA), although cross reaction with *Leishmania* spp. is a potential problem, diminishing the reliability of antibody-based assays as first-line diagnostics [20]. Depending on diagnostic used, confirmatory tests may be necessary [1,15,20]. Use of serology to diagnose congenital infection in infants born to infected mothers is complicated by the presence of maternal antibodies until about 8 months of age [1,21]. Serologic testing is recommended at 1, 6, and 12 months of age [1,21]. If possible, testing should be performed in conjunction with microscopic detection of live parasites in umbilical cord blood or the infant's peripheral blood, as parasitemia can be detected during the acute phase of infection [1]. Giemsa stain of blood smears or buffy coat can be performed any time between birth and 6 months of age to diagnose congenital CD but is most effective in the first month to isolate exposure of the infant to maternal sources [1,2]. Congenital infections are confirmed with positive identification of parasites

prior to 6 months of age and/or seropositivity at 10 months of age or older [21]. Non-infected children should be seronegative after 10 months and have no detectable parasites via blood smear microscopy [1]. PCR of umbilical cord blood and infant peripheral blood has been shown to detect infection a few weeks after birth and can be beneficial in diagnosis of cases with low parasite transmission [22,23].

There are an estimated 0.2–0.4 million cases of VL each year, causing 20,000–40,000 deaths annually [24]. However, unlike CD, the number of case reports of vertical *L. infantum* transmission in humans are limited (Fig 1B, gray dots) [8]. The lack of human congenital cases is attributed to the lack of awareness of VL by health care providers, particularly in non-endemic settings, and/or availability of treatment of mothers for ZVL during pregnancy to reduce the maternal parasite load [25,26]. In contrast, treatment for CD during pregnancy is not advised due to teratogenic potential of available drugs [1].

The majority of reports of ZVL vertical transmission are from the reservoir host, dogs. Until recently, maintenance of canine disease was thought to be due only to vector-borne transmission in dogs living in or traveling to endemic areas. In dogs, natural vertical *L. infantum* transmission is increasingly recognized to occur in both endemic and non-endemic countries (Fig 1B, black squares) [27–29]. Canine ZVL seroprevalence rates range from 4% to 57% based on location [5]. Estimates of vertical transmission rates are difficult to determine due to the lack of a specific marker for vertical transmission within the canine population, particularly in endemic areas where vector-borne transmission occurs.

In North America, where VL is endemic in hunting dogs, seroprevalence ranges from 8.8% to 9.8% [4]. Vertical transmission was induced experimentally in a beagle in 2005 [30] and suspected in two sibling dogs in 2008 [31]. Natural vertical transmission was confirmed in a 2011 report of infected pups [27,32]. Similarly to human congenital infections, there are multiple instances of familial clustering [33] and multigenerational spread. This may highlight the possibility of genetic predisposition and has been validated in both dogs and humans [34]. Canine cases have been diagnosed by serology (ELISA, indirect fluorescent-antibody test [IFAT], or others), molecular tests, (quantitative polymerase chain reaction [qPCR]), or rapid immunochromogenic tests such as the Dual Path Platform canine visceral leishmaniasis test (DPP CVL) [33,35–37]. qPCR on maternal blood or on blood or tissues from pups can be used to detect infection and is available in conjunction with other testing methods [4,27,33]. Culling of positive dogs is used by some breeding kennels once vertical transmission has been detected and is used to control vector-borne disease and, presumptively, vertical transmission in endemic areas [38]. Due to conflicts between test-and-cull programs and test-and-treat/sterilize or other potential campaigns to halt vertical transmission within dogs in endemic areas, there is a dramatic disparity between international efforts to address congenital CD in humans and vertical VL in the reservoir host for human ZVL, dogs.

## What Are Signs and Symptoms of Congenitally Transmitted CD or VL?

The majority of *T. cruzi*-infected women acquire *T. cruzi* through vector transmission. Vertically transmitting mothers are usually in the asymptomatic phase when pregnant, and most pregnancies are without complication [13]. The majority of infected infants have asymptomatic CD, but a proportion will develop chronic disease with cardiac and/or gastrointestinal symptoms years later [2,21]. In cases of overt congenital CD, symptoms are present at birth or appear days to weeks later [1,21]. Symptoms are nonspecific with low birth weight (in up to 40% of births), prematurity, reduced growth rates, hepatomegaly, splenomegaly, and jaundice [21]. Respiratory distress frequently occurs secondary to prematurity or due to parasite-

induced pneumonitis [21]. Severe CD occasionally presents with meningoencephalitis with or without microencephaly, acute myocarditis with cardiomegaly and arrhythmias, anemia, and thrombocytopenia [21]. Rarely chorioretinitis, opaque vitreous body, megaesophagus, and megacolon occurs, with fatality more likely if gastrointestinal symptoms are present. Mortality is approximately 5% and is directly correlated with severity of symptoms [21].

Canine vertical ZVL is progressive, with vertically-infected dogs initially asymptomatic. As signs and symptoms appear, they are at first nonspecific (generalized lymphadenopathy, depression), then more pronounced (serosanguineous nasal discharge and dull hair coat) [4,5]. Signs are more severe and pathognomonic for ZVL later in disease: splenomegaly, hepatomegaly, loss of body condition [4,5]. Notably, infected females are more often asymptomatic at breeding, but secondary immunosuppression such as concurrent tick-borne disease or pregnancy alone initiates seroconversion and progressive ZVL [4]. Congenitally infected pups are often asymptomatic and remain so for months to years until secondary immunosuppression occurs [4]. Mortality rates for congenital ZVL in dogs are unknown.

### What Are Maternal Immunologic Risk Factors for Vertical Transmission?

*T. cruzi* transmission risk increases with higher maternal parasite load and/or reactivated disease [1,21]. Mothers who transmit *T. cruzi* to their infants often have decreased TNF- $\alpha$  and IFN- $\gamma$  serum cytokine levels, decreased expression of CD54 and HLA-DR on CD14<sup>+</sup> monocytes, and increased *T. cruzi*-specific IgM compared to non-transmitting infected women [21]. Non-transmitting women have higher levels of serum pro-inflammatory cytokines, IL-1- $\beta$ , IL-5, and TNF- $\alpha$  [21]. Maternal coinfection with HIV or malaria increases risk of transmission [1,21]. CD transmission through breast milk has not been confirmed [21,39]. Risk for congenital infection increases with placental trophoblastic parasite load and decreased placental IFN- $\gamma$  and TNF- $\alpha$  levels. Non-infected infants from infected mothers have 60% higher TNF-R2 receptor levels [21]. It is unclear whether there are specific *T. cruzi* factors that promote vertical transmission [2]. Genotypes TcII and TcV, which have different tissue tropisms, are known to be transmitted vertically, but it is unknown if additional genotypes can also cause congenital infection [2].

Leishmaniasis transmission also occurs transplacentally in dogs, but the exact timing is unknown. Pregnant females coinfecting with helminths, rickettsial disease, heartworm, and other diseases are at greater risk of transmission due to immunosuppression [5]. Defense against leishmaniasis requires a Th1 response with IL-12 and IFN- $\gamma$  secretion by CD4<sup>+</sup> T cells. Presence of these immune factors reduces the risk of transmission from dam to pup [33,40]. In active ZVL, increased IL-10 and blood parasite load is observed along with decreased IFN- $\gamma$  [40]. As severity increases, CD4<sup>+</sup> T cell proliferation and IFN- $\gamma$  levels decrease, indicating a state of T cell exhaustion, while IL-10 rises, [40] increasing maternal transmission risk. In congenitally infected, asymptomatic pups, CD4<sup>+</sup> T cells retain the ability to proliferate in response to parasite antigens. In response to persistent infection in the face of inflammation, these dogs also have decreased T cell proliferation as disease progresses and symptoms appear [40,41]. Parasite-specific factors for vertical transmission of VL are unknown but may be important for targeting placental interaction.

### What Can Be Done to Reduce the Risk of Vertical Transmission?

CD and ZVL vertical transmission risk increases when mothers have an increased parasite load, are co-infected with other pathogens, or have other co-morbid immunosuppressive disease with subsequent lack of an appropriate immune response to *T. cruzi* or *L. infantum*

infection [1,5,21,33,40]. Detection of maternal infection is critical. If done prior to pregnancy, the mother can seek treatment and may consider delaying pregnancy until treatment is complete. CD cannot be treated during pregnancy, although treatment of pregnant women for ZVL is possible [1,21,25,26]. Dogs positive for ZVL are not recommended for breeding. If a pregnant mother is positive for either CD or VL, testing of the infant is recommended to limit disease manifestations, as vertical transmission has already occurred [1,42]. Informing gynecologists and general practitioners with at-risk (born in endemic area) patients of child-bearing age about CD and ZVL is imperative. This will promote patient education and accurate assessment of congenital infection risk [26,42].

## Supporting Information

### S1 File. Map methods and references.

(DOCX)

## References

1. Carlier Y, Torrico F, Sosa-Estani S, Russomando G, Luquetti A, Freilij H, et al. Congenital Chagas disease: recommendations for diagnosis, treatment and control of newborns, siblings and pregnant women. *PLoS Negl Trop Dis*. 2011; 5(10):e1250. doi: [10.1371/journal.pntd.0001250](https://doi.org/10.1371/journal.pntd.0001250) PMID: [22039554](https://pubmed.ncbi.nlm.nih.gov/22039554/); PubMed Central PMCID: PMC3201907.
2. Carlier Y, Sosa-Estani S, Luquetti AO, Buekens P. Congenital Chagas disease: an update. *Mem Inst Oswaldo Cruz*. 2015; 110(3):363–8. doi: [10.1590/0074-02760140405](https://doi.org/10.1590/0074-02760140405) PMID: [25760448](https://pubmed.ncbi.nlm.nih.gov/25760448/); PubMed Central PMCID: PMC4489473.
3. Schaut RG, Robles-Murguía M, Juelsgaard R, Esch KJ, Bartholomay LC, Ramalho-Ortigao M, et al. Vertically-transmitted *Leishmania infantum* from North American dogs maintains bailiety for vector-borne transmission in *Lutzomyia* spp. *Emerg Infect Dis*. 2015;in press.
4. Petersen CA, Barr SC. Canine leishmaniasis in North America: emerging or newly recognized? *Vet Clin North Am Small Anim Pract*. 2009; 39(6):1065–74, vi. Epub 2009/11/26. S0195-5616(09)00100-4 [pii] doi: [10.1016/j.cvsm.2009.06.008](https://doi.org/10.1016/j.cvsm.2009.06.008) PMID: [19932363](https://pubmed.ncbi.nlm.nih.gov/19932363/); PubMed Central PMCID: PMC2824922.
5. Esch KJ, Petersen CA. Transmission and epidemiology of zoonotic protozoal diseases of companion animals. *Clin Microbiol Rev*. 2013; 26(1):58–85. doi: [10.1128/CMR.00067-12](https://doi.org/10.1128/CMR.00067-12) PMID: [23297259](https://pubmed.ncbi.nlm.nih.gov/23297259/); PubMed Central PMCID: PMC3553666.
6. Chagas disease in Latin America: an epidemiological update based on 2010 estimates. *Wkly Epidemiol Rec*. 2015; 90(6):33–43. PMID: [25671846](https://pubmed.ncbi.nlm.nih.gov/25671846/).
7. World Health Organization. Chagas Disease (American trypanosomiasis) Fact Sheet2015. <http://www.who.int/mediacentre/factsheets/fs340/en/>.
8. Carlier Y, Truyens C, Deloron P, Peyron F. Congenital parasitic infections: a review. *Acta tropica*. 2012; 121(2):55–70. doi: [10.1016/j.actatropica.2011.10.018](https://doi.org/10.1016/j.actatropica.2011.10.018) PMID: [22085916](https://pubmed.ncbi.nlm.nih.gov/22085916/).
9. Howard EJ, Xiong X, Carlier Y, Sosa-Estani S, Buekens P. Frequency of the congenital transmission of *Trypanosoma cruzi*: a systematic review and meta-analysis. *BJOG*. 2014; 121(1):22–33. doi: [10.1111/1471-0528.12396](https://doi.org/10.1111/1471-0528.12396) PMID: [23924273](https://pubmed.ncbi.nlm.nih.gov/23924273/); PubMed Central PMCID: PMC3914719.
10. (CDC) CfDCaP. Congenital transmission of Chagas disease—Virginia, 2010. *MMWR Morb Mortal Wkly Rep*. 2012; 61(26):477–9. PMID: [22763884](https://pubmed.ncbi.nlm.nih.gov/22763884/).
11. Mongeau-Martin G, Ndao M, Libman M, Delage G, Ward BJ. A family cluster of Chagas disease detected through selective screening of blood donors: A case report and brief review. *Can J Infect Dis Med Microbiol*. 2015; 26(3):157–61. PMID: [26236358](https://pubmed.ncbi.nlm.nih.gov/26236358/); PubMed Central PMCID: PMC34507842.
12. Sosa-Estani S, Cura E, Velazquez E, Yampotis C, Segura EL. Etiological treatment of young women infected with *Trypanosoma cruzi*, and prevention of congenital transmission. *Revista da Sociedade Brasileira de Medicina Tropical*. 2009; 42(5):484–7. PMID: [19967227](https://pubmed.ncbi.nlm.nih.gov/19967227/).
13. Sánchez Negrette O, Mora MC, Basombrío MA. High prevalence of congenital *Trypanosoma cruzi* infection and family clustering in Salta, Argentina. *Pediatrics*. 2005; 115(6):e668–72. doi: [10.1542/peds.2004-1732](https://doi.org/10.1542/peds.2004-1732) PMID: [15930194](https://pubmed.ncbi.nlm.nih.gov/15930194/).
14. Verani JR, Montgomery SP, Schulkin J, Anderson B, Jones JL. Survey of obstetrician-gynecologists in the United States about Chagas disease. *Am J Trop Med Hyg*. 2010; 83(4):891–5. doi: [10.4269/ajtmh.2010.09-0543](https://doi.org/10.4269/ajtmh.2010.09-0543) PMID: [20889886](https://pubmed.ncbi.nlm.nih.gov/20889886/); PubMed Central PMCID: PMC2946763.



15. Sánchez-Camargo CL, Albajar-Viñas P, Wilkins PP, Nieto J, Leiby DA, Paris L, et al. Comparative evaluation of 11 commercialized rapid diagnostic tests for detecting *Trypanosoma cruzi* antibodies in serum banks in areas of endemicity and nonendemicity. *Journal of clinical microbiology*. 2014; 52(7):2506–12. doi: [10.1128/JCM.00144-14](https://doi.org/10.1128/JCM.00144-14) PMID: [24808239](https://pubmed.ncbi.nlm.nih.gov/24808239/); PubMed Central PMCID: [PMCPMC4097696](https://pubmed.ncbi.nlm.nih.gov/PMC/PMC4097696/).
16. Ramírez JC, Cura CI, da Cruz Moreira O, Lages-Silva E, Juiz N, Velázquez E, et al. Analytical Validation of Quantitative Real-Time PCR Methods for Quantification of *Trypanosoma cruzi* DNA in Blood Samples from Chagas Disease Patients. *J Mol Diagn*. 2015; 17(5):605–15. doi: [10.1016/j.jmoldx.2015.04.010](https://doi.org/10.1016/j.jmoldx.2015.04.010) PMID: [26320872](https://pubmed.ncbi.nlm.nih.gov/26320872/).
17. Duffy T, Cura CI, Ramirez JC, Abate T, Cayo NM, Parrado R, et al. Analytical performance of a multiplex Real-Time PCR assay using TaqMan probes for quantification of *Trypanosoma cruzi* satellite DNA in blood samples. *PLoS Negl Trop Dis*. 2013; 7(1):e2000. doi: [10.1371/journal.pntd.0002000](https://doi.org/10.1371/journal.pntd.0002000) PMID: [23350002](https://pubmed.ncbi.nlm.nih.gov/23350002/); PubMed Central PMCID: [PMCPMC3547845](https://pubmed.ncbi.nlm.nih.gov/PMC/PMC3547845/).
18. Schijman AG, Bisio M, Orellana L, Sued M, Duffy T, Mejia Jaramillo AM, et al. International study to evaluate PCR methods for detection of *Trypanosoma cruzi* DNA in blood samples from Chagas disease patients. *PLoS Negl Trop Dis*. 2011; 5(1):e931. doi: [10.1371/journal.pntd.0000931](https://doi.org/10.1371/journal.pntd.0000931) PMID: [21264349](https://pubmed.ncbi.nlm.nih.gov/21264349/); PubMed Central PMCID: [PMCPMC3019106](https://pubmed.ncbi.nlm.nih.gov/PMC/PMC3019106/).
19. Otani MM, Vinelli E, Kirchoff LV, del Pozo A, Sands A, Vercauteren G, et al. WHO comparative evaluation of serologic assays for Chagas disease. *Transfusion*. 2009; 49(6):1076–82. doi: [10.1111/j.1537-2995.2009.02107.x](https://doi.org/10.1111/j.1537-2995.2009.02107.x) PMID: [19290995](https://pubmed.ncbi.nlm.nih.gov/19290995/).
20. Caballero ZC, Sousa OE, Marques WP, Saez-Alquezar A, Umezawa ES. Evaluation of serological tests to identify *Trypanosoma cruzi* infection in humans and determine cross-reactivity with *Trypanosoma rangeli* and *Leishmania* spp. *Clin Vaccine Immunol*. 2007; 14(8):1045–9. doi: [10.1128/CVI.00127-07](https://doi.org/10.1128/CVI.00127-07) PMID: [17522327](https://pubmed.ncbi.nlm.nih.gov/17522327/); PubMed Central PMCID: [PMCPMC2044488](https://pubmed.ncbi.nlm.nih.gov/PMC/PMC2044488/).
21. Cevallos AM, Hernández R. Chagas' disease: pregnancy and congenital transmission. *Biomed Res Int*. 2014; 2014:401864. doi: [10.1155/2014/401864](https://doi.org/10.1155/2014/401864) PMID: [24949443](https://pubmed.ncbi.nlm.nih.gov/24949443/); PubMed Central PMCID: [PMCPMC4052072](https://pubmed.ncbi.nlm.nih.gov/PMC/PMC4052072/).
22. Bua J, Volta BJ, Velazquez EB, Ruiz AM, Rissio AM, Cardoni RL. Vertical transmission of *Trypanosoma cruzi* infection: quantification of parasite burden in mothers and their children by parasite DNA amplification. *Trans R Soc Trop Med Hyg*. 2012; 106(10):623–8. doi: [10.1016/j.trstmh.2012.03.015](https://doi.org/10.1016/j.trstmh.2012.03.015) PMID: [22835758](https://pubmed.ncbi.nlm.nih.gov/22835758/).
23. Bua J, Volta BJ, Perrone AE, Scollo K, Velázquez EB, Ruiz AM, et al. How to improve the early diagnosis of *Trypanosoma cruzi* infection: relationship between validated conventional diagnosis and quantitative DNA amplification in congenitally infected children. *PLoS Negl Trop Dis*. 2013; 7(10):e2476. doi: [10.1371/journal.pntd.0002476](https://doi.org/10.1371/journal.pntd.0002476) PMID: [24147166](https://pubmed.ncbi.nlm.nih.gov/24147166/); PubMed Central PMCID: [PMCPMC3798617](https://pubmed.ncbi.nlm.nih.gov/PMC/PMC3798617/).
24. World Health Organization. Leishmaniasis Fact Sheet 2015. <http://www.who.int/mediacentre/factsheets/fs375/en/>.
25. Figueiró-Filho EA, El Beitune P, Queiroz GT, Somensi RS, Morais NO, Dorval ME, et al. Visceral leishmaniasis and pregnancy: analysis of cases reported in a central-western region of Brazil. *Arch Gynecol Obstet*. 2008; 278(1):13–6. doi: [10.1007/s00404-007-0532-0](https://doi.org/10.1007/s00404-007-0532-0) PMID: [18087708](https://pubmed.ncbi.nlm.nih.gov/18087708/).
26. Pagliano P, Carannante N, Rossi M, Gramiccia M, Gradoni L, Faella FS, et al. Visceral leishmaniasis in pregnancy: a case series and a systematic review of the literature. *J Antimicrob Chemother*. 2005; 55(2):229–33. doi: [10.1093/jac/dkh538](https://doi.org/10.1093/jac/dkh538) PMID: [15649998](https://pubmed.ncbi.nlm.nih.gov/15649998/).
27. Boggiatto PM, Gibson-Corley KN, Metz K, Gallup JM, Hostetter JM, Mullin K, et al. Transplacental transmission of *Leishmania infantum* as a means for continued disease incidence in North America. *PLoS Negl Trop Dis*. 2011; 5(4):e1019. doi: [10.1371/journal.pntd.0001019](https://doi.org/10.1371/journal.pntd.0001019) PMID: [21532741](https://pubmed.ncbi.nlm.nih.gov/21532741/); PubMed Central PMCID: [PMCPMC3075227](https://pubmed.ncbi.nlm.nih.gov/PMC/PMC3075227/).
28. Naucke TJ, Lorentz S. First report of venereal and vertical transmission of canine leishmaniosis from naturally infected dogs in Germany. *Parasit Vectors*. 2012; 5:67. Epub 2012/04/03. 1756-3305-5-67 [pii] doi: [10.1186/1756-3305-5-67](https://doi.org/10.1186/1756-3305-5-67) PMID: [22463789](https://pubmed.ncbi.nlm.nih.gov/22463789/); PubMed Central PMCID: [PMCPMC3350385](https://pubmed.ncbi.nlm.nih.gov/PMC/PMC3350385/).
29. Mancianti F, Sozzi S. Isolation of *Leishmania* from a newborn puppy. *Transactions of the Royal Society of Tropical Medicine and Hygiene*. 1995; 89(4):402. PMID: [CABI:19950809951](https://pubmed.ncbi.nlm.nih.gov/19950809951/).
30. Rosypal AC, Troy GC, Zajac AM, Frank G, Lindsay DS. Transplacental transmission of a North American isolate of *Leishmania infantum* in an experimentally infected beagle. *J Parasitol*. 2005; 91(4):970–2. Epub 2006/11/09. PMID: [17089780](https://pubmed.ncbi.nlm.nih.gov/17089780/).
31. Gibson-Corley KN, Hostetter JM, Hostetter SJ, Mullin K, Ramer-Tait AE, Boggiatto PM, et al. Disseminated *Leishmania infantum* infection in two sibling foxhounds due to possible vertical transmission. *Can Vet J*. 2008; 49(10):1005–8. Epub 2009/01/03. PMID: [19119370](https://pubmed.ncbi.nlm.nih.gov/19119370/); PubMed Central PMCID: [PMC2553493](https://pubmed.ncbi.nlm.nih.gov/PMC/PMC2553493/).
32. da Silva SM, Ribeiro VM, Ribeiro RR, Tafuri WL, Melo MN, Michalick MS. First report of vertical transmission of *Leishmania (Leishmania) infantum* in a naturally infected bitch from Brazil. *Vet Parasitol*.

- 2009; 166(1–2):159–62. Epub 2009/09/08. S0304-4017(09)00497-X [pii] doi: [10.1016/j.vetpar.2009.08.011](https://doi.org/10.1016/j.vetpar.2009.08.011) PMID: [19733439](https://pubmed.ncbi.nlm.nih.gov/19733439/).
33. Petersen CA. New means of canine leishmaniasis transmission in north america: the possibility of transmission to humans still unknown. *Interdiscip Perspect Infect Dis*. 2009; 2009:802712. Epub 2009/09/16. doi: [10.1155/2009/802712](https://doi.org/10.1155/2009/802712) PMID: [19753139](https://pubmed.ncbi.nlm.nih.gov/19753139/); PubMed Central PMCID: PMC2695953.
  34. Fakiola M, Miller EN, Fadl M, Mohamed HS, Jamieson SE, Francis RW, et al. Genetic and functional evidence implicating DLL1 as the gene that influences susceptibility to visceral leishmaniasis at chromosome 6q27. *J Infect Dis*. 2011; 204(3):467–77. Epub 2011/07/12. jir284 [pii] doi: [10.1093/infdis/jir284](https://doi.org/10.1093/infdis/jir284) PMID: [21742847](https://pubmed.ncbi.nlm.nih.gov/21742847/); PubMed Central PMCID: PMC3132144.
  35. Gibson-Corley KN, Hostetter J. M., Hostetter S. J., Mullin K., Ramer-Tait A. E., Boggiatto M. P., Petersen C. A. Disseminated *Leishmania infantum* Infection in Two Sibling American Foxhound Dogs from Potential Vertical Transmission. *Vet Path*. 2008;submitted.
  36. Castro-Júnior JG, Freire ML, Campos SP, Scopel KK, Porrozzi R, Da Silva ED, et al. Evidence of Leishmania (Leishmania) infantum infection in dogs from Juiz de Fora, Minas Gerais State, Brazil, based on immunochromatographic dual-path platform (DPP) and PCR assays. *Revista do Instituto de Medicina Tropical de Sao Paulo*. 2014; 56(3):225–9. PMID: [24879001](https://pubmed.ncbi.nlm.nih.gov/24879001/); PubMed Central PMCID: PMCPMC4085865.
  37. Grimaldi G, Teva A, Ferreira AL, dos Santos CB, Pinto I, de-Azevedo CT, et al. Evaluation of a novel chromatographic immunoassay based on Dual-Path Platform technology (DPP CVL rapid test) for the serodiagnosis of canine visceral leishmaniasis. *Trans R Soc Trop Med Hyg*. 2012; 106(1):54–9. doi: [10.1016/j.trstmh.2011.10.001](https://doi.org/10.1016/j.trstmh.2011.10.001) PMID: [22137538](https://pubmed.ncbi.nlm.nih.gov/22137538/).
  38. Esch KJ, Pontes NN, Arruda P, O'Connor A, Morais L, Jeronimo SM, et al. Preventing zoonotic canine leishmaniasis in northeastern Brazil: pet attachment and adoption of community Leishmania prevention. *The American journal of tropical medicine and hygiene*. 2012; 87(5):822–31. doi: [10.4269/ajtmh.2012.12-0251](https://doi.org/10.4269/ajtmh.2012.12-0251) PMID: [22987654](https://pubmed.ncbi.nlm.nih.gov/22987654/); PubMed Central PMCID: PMC3516256.
  39. Norman FF, López-Vélez R. Chagas disease and breast-feeding. *Emerg Infect Dis*. 2013; 19(10):1561–6. doi: [10.3201/eid1910.130203](https://doi.org/10.3201/eid1910.130203) PMID: [24050257](https://pubmed.ncbi.nlm.nih.gov/24050257/); PubMed Central PMCID: PMCPMC3810739.
  40. Boggiatto PM, Ramer-Tait AE, Metz K, Kramer EE, Gibson-Corley K, Mullin K, et al. Immunologic indicators of clinical progression during canine *Leishmania infantum* infection. *Clinical and vaccine immunology: CVI*. 2010; 17(2):267–73. doi: [10.1128/CVI.00456-09](https://doi.org/10.1128/CVI.00456-09) PMID: [20032217](https://pubmed.ncbi.nlm.nih.gov/20032217/); PubMed Central PMCID: PMC2815526.
  41. Esch KJ, Juelsgaard R, Martinez PA, Jones DE, Petersen CA. Programmed death 1-mediated T cell exhaustion during visceral leishmaniasis impairs phagocyte function. *J Immunol*. 2013; 191(11):5542–50. Epub 2013/10/25. doi: [10.4049/jimmunol.1301810](https://doi.org/10.4049/jimmunol.1301810) PMID: [24154626](https://pubmed.ncbi.nlm.nih.gov/24154626/); PubMed Central PMCID: PMCPmc3896087.
  42. Norman FF, López-Vélez R. Mother-to-child transmission of *Trypanosoma cruzi* infection (Chagas disease): a neglected problem. *Trans R Soc Trop Med Hyg*. 2014; 108(7):388–90. doi: [10.1093/trstmh/tru062](https://doi.org/10.1093/trstmh/tru062) PMID: [24771504](https://pubmed.ncbi.nlm.nih.gov/24771504/).
